# Supplementary material for: A two-dimensional assembly of ultrafine cobalt oxide nanocrystallites anchored on single-layer Ti3C2Tx nanosheets with enhanced lithium storage for Li-ion batteries
Source: Royal Society of Chemistry journal article supplement (doi:10.1039/c9nr04377b), 2019-01-01
Supplement: c9nr04377b1.pdf [file c9nr04377b1.pdf]

## **Electronic Supporting Information**

### **Two-dimensional assembly of ultrafine cobalt oxide nanocrystallites anchored on single-layer $\text{Ti}_3\text{C}_2\text{T}_x$ nanosheets with enhanced lithium storage for Li-ion batteries**

Xuan Sun, Ke Tan, Yang Liu, Jinyang Zhang, Dienguila Kionga Denis, Fakhr uz  
Zaman, Linrui Hou, Changzhou Yuan\*

School of Material Science & Engineering, University of Jinan, Jinan, 250022, P. R.  
China

\*E-mail: mse\_yuancz@ujn.edu.cn; ayuancz@163.com

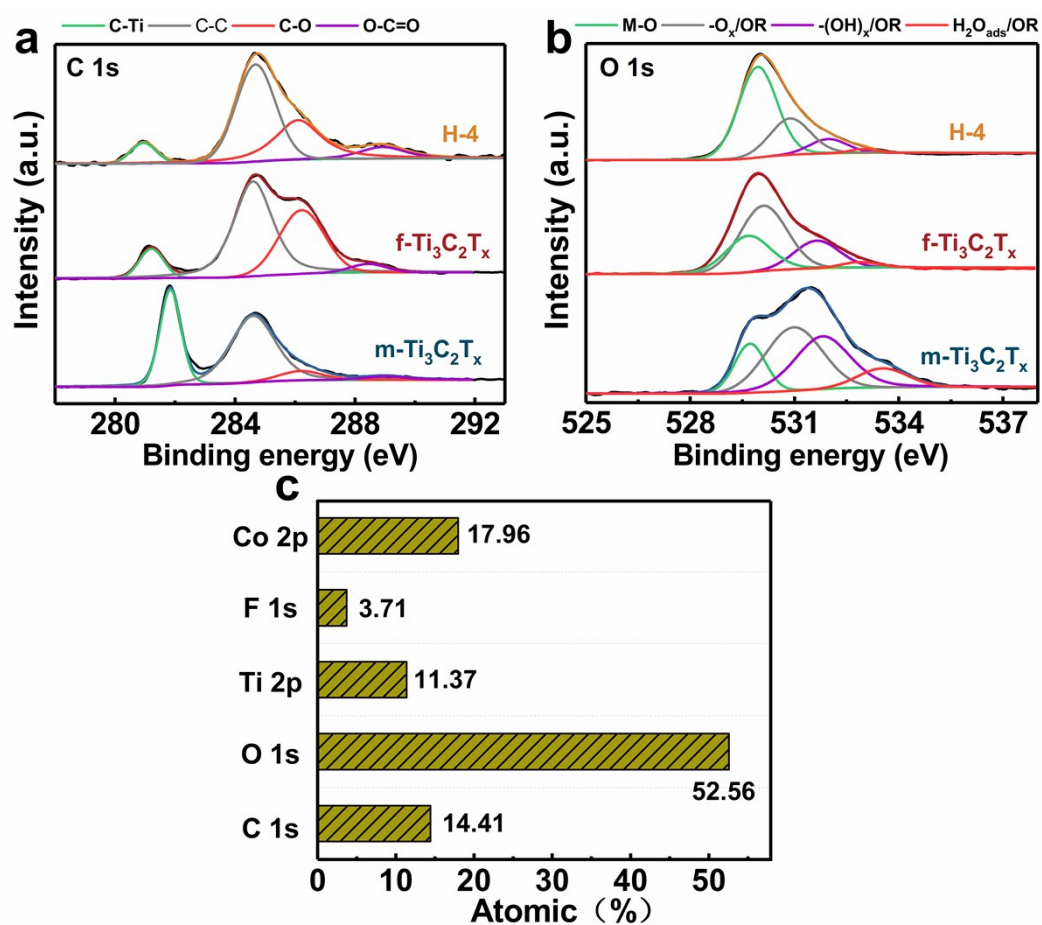

**Fig. S1** High-resolution XPS spectra of (a) C 1s and (b) O 1s for the m-Ti<sub>3</sub>C<sub>2</sub>T<sub>x</sub>, f-Ti<sub>3</sub>C<sub>2</sub>T<sub>x</sub>, and H-4, and (c) corresponding atomic ratio of Co, F, Ti, O, C elements in H-4.

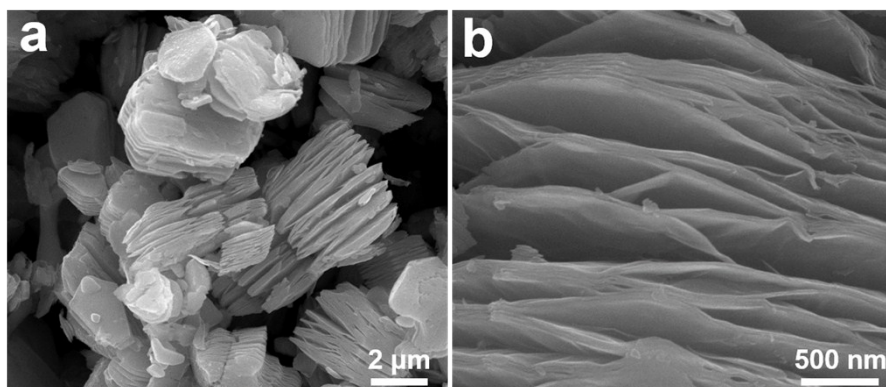

**Fig. S2** (a) Low- and (b) high-resolution FESEM images of the  $m\text{-Ti}_3\text{C}_2\text{T}_x$ .

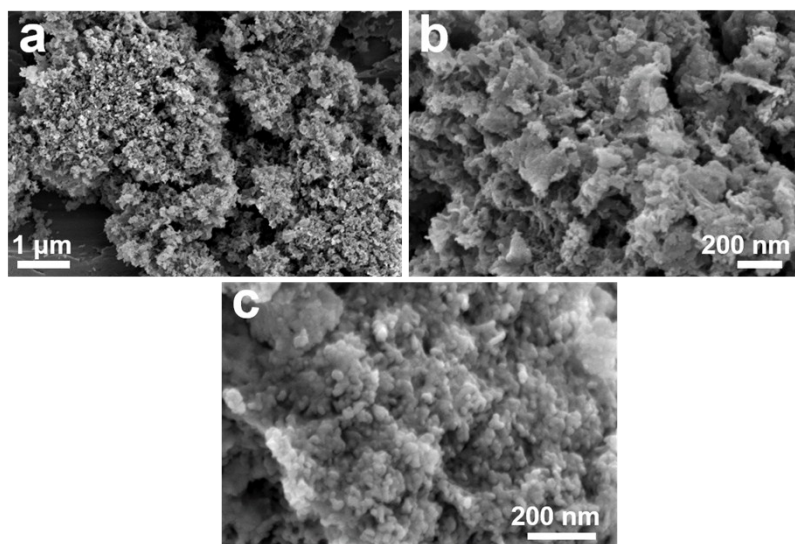

**Fig. S3** FESEM images with different magnifications for the H-4 sample obtained by the refrigerator pre-freezing method.

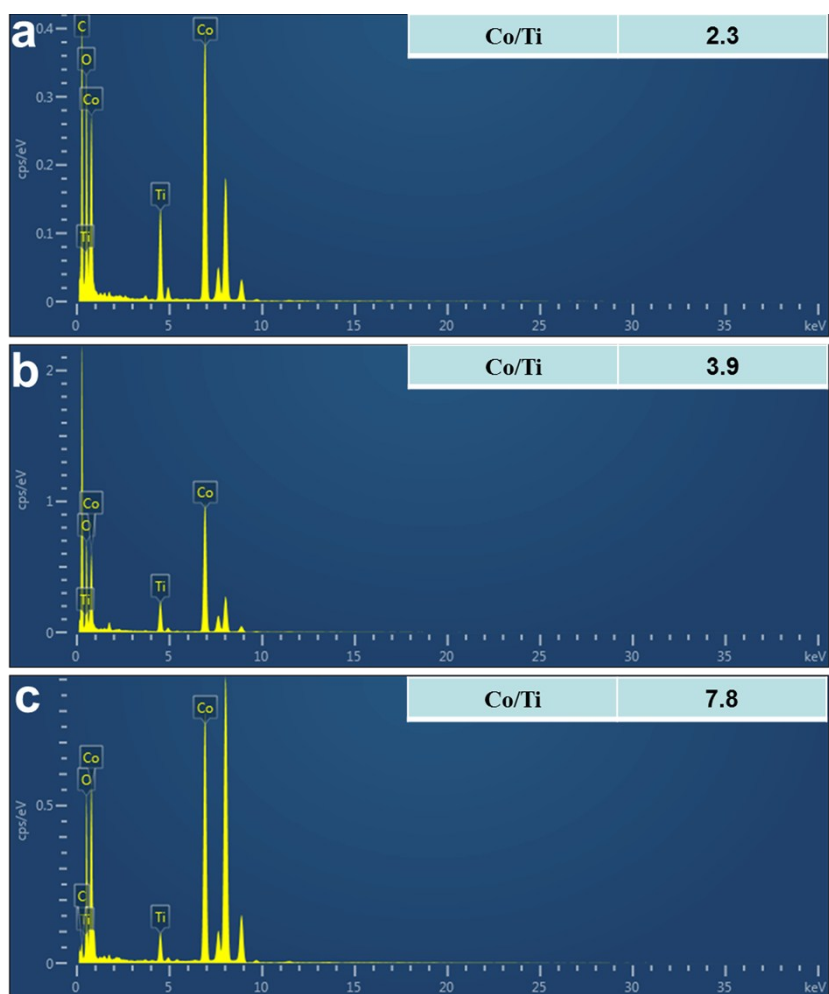

**Fig. S4** EDS data and Co/Ti atomic ratio (the insets) for the (a) H-2, (b) H-4 and (c) H-8 samples as indicated.

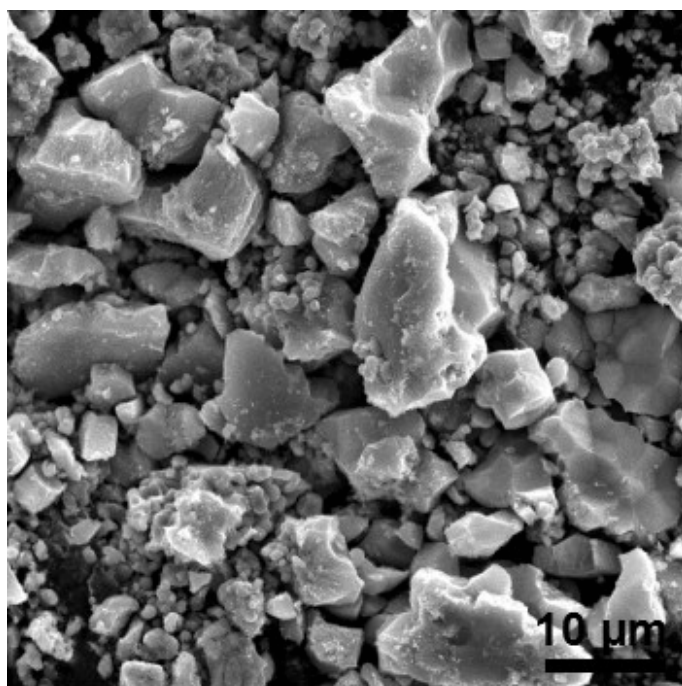

**Fig. S5** FESEM image of the pure  $\text{Co}_3\text{O}_4$  sample.

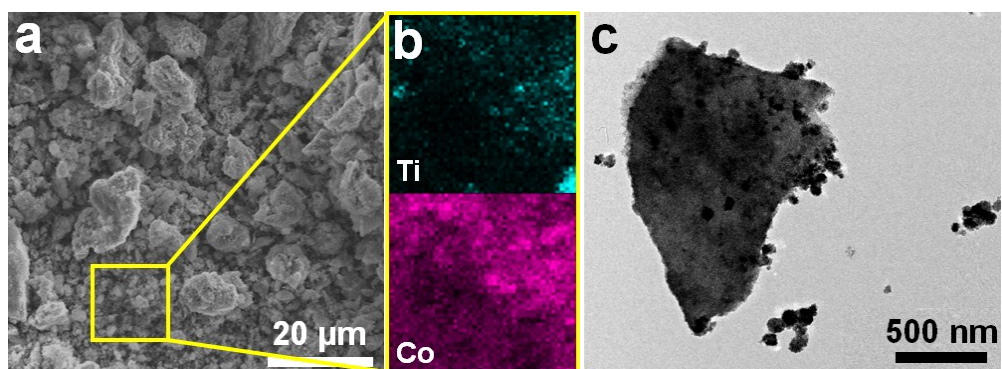

**Fig. S6** (a) FESEM, (b) elemental (Ti, Co) mapping and (c) TEM images of the H-12 sample. The image in panel (b) is taken from the yellow rectangle in panel (a) as indicated.

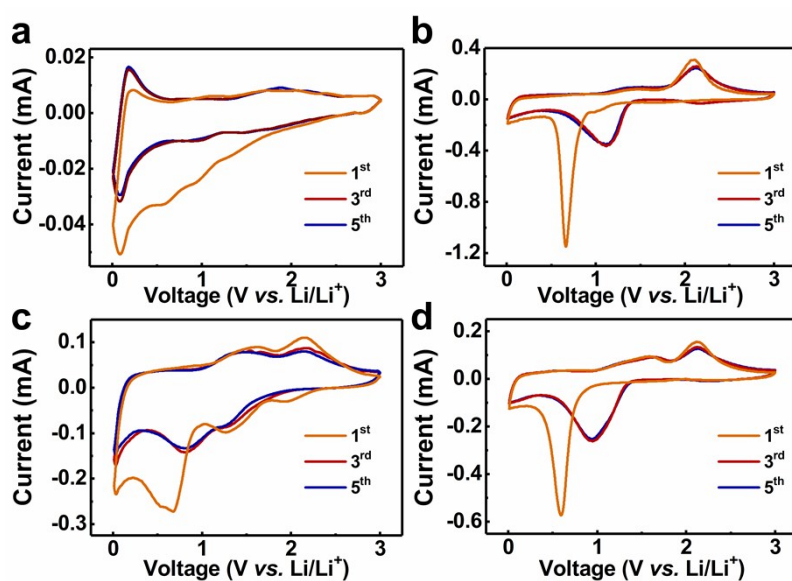

**Fig. S7** The 1<sup>st</sup>, 3<sup>rd</sup> and 5<sup>th</sup> CVs curves (0.1 mV s<sup>-1</sup>) for the (a) f-Ti<sub>3</sub>C<sub>2</sub>T<sub>x</sub>, (b) Co<sub>3</sub>O<sub>4</sub>, (c) H-2 and (d) H-8 samples, respectively.



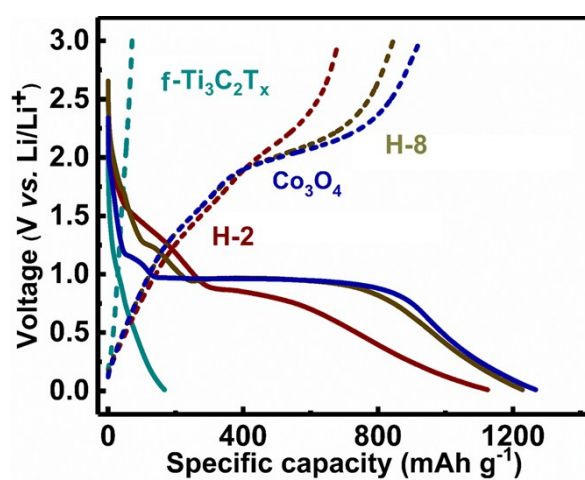

**Fig. S8** The 1<sup>st</sup> galvanostatic charge-discharge plots (0.1 A g<sup>-1</sup>) for the f-Ti<sub>3</sub>C<sub>2</sub>T<sub>x</sub>, H-2, H-8 and Co<sub>3</sub>O<sub>4</sub> samples, respectively.

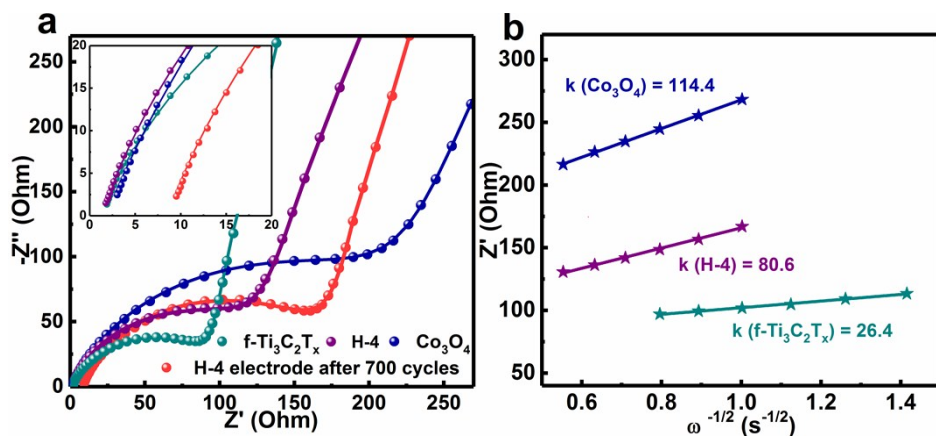

**Fig. S9** (a) EIS and corresponding fitted lines for fresh cells of the  $f\text{-Ti}_3\text{C}_2\text{T}_x$ ,  $\text{Co}_3\text{O}_4$ , H-4 and the H-4 electrode after 700 cycles at  $1 \text{ A g}^{-1}$ . (b)  $Z'$  vs.  $\omega^{-1/2}$  plots and the slopes of fitted lines for fresh cells of the  $f\text{-Ti}_3\text{C}_2\text{T}_x$ ,  $\text{Co}_3\text{O}_4$ , H-4 in low-frequency region. The inset in panel (a) is the magnification of EIS profiles.

**Table S1.** Binding energy values of Ti 2p, C 1s and O 1s core levels for m-Ti<sub>3</sub>C<sub>2</sub>T<sub>x</sub> f-

| Ti <sub>3</sub> C <sub>2</sub> T <sub>x</sub> and H-4 |                                                 |                                                 |                                |                                     |
|-------------------------------------------------------|-------------------------------------------------|-------------------------------------------------|--------------------------------|-------------------------------------|
| Binding energy<br>(eV)                                | m-Ti <sub>3</sub> C <sub>2</sub> T <sub>x</sub> | f-Ti <sub>3</sub> C <sub>2</sub> T <sub>x</sub> | H-4                            | Assigned to                         |
| Ti 2p                                                 | 455.00/460.94                                   | 454.71/459.23                                   | /                              | Ti                                  |
|                                                       | 455.92/461.50                                   | 455.90/461.62                                   | /                              | Ti <sup>2+</sup>                    |
|                                                       | 457.46/462.92                                   | 457.94/463.90                                   | 458.01/463.98                  | Ti <sup>3+</sup>                    |
|                                                       | 459.57/465.72                                   | 458.74/464.80                                   | 459.09/464.75<br>459.78/465.50 | Ti-O                                |
| C 1s                                                  | 281.84                                          | 281.21                                          | 280.97                         | C-Ti                                |
|                                                       | 284.60                                          | 284.60                                          | 284.60                         | C-C                                 |
|                                                       | 286.19                                          | 286.22                                          | 285.83                         | C-O                                 |
|                                                       | 289.02                                          | 288.43                                          | 288.71                         | O-C=O                               |
| O 1s                                                  | 529.72                                          | 529.70                                          | 529.94                         | M-O (Ti-O<br>and/or Co-<br>O)       |
|                                                       | 530.87                                          | 530.14                                          | 530.87                         | -O <sub>x</sub> /OR                 |
|                                                       | 531.79                                          | 531.68                                          | 531.97                         | -(OH) <sub>x</sub> /OR              |
|                                                       | 533.04                                          | 532.94                                          | 532.97                         | H <sub>2</sub> O <sub>ads</sub> /OR |

**Table S2.** Corresponding EIS fitted data for the f-Ti<sub>3</sub>C<sub>2</sub>T<sub>x</sub>, Co<sub>3</sub>O<sub>4</sub>, H-4 and H-4

anodes after 700 cycles at 1 A g<sup>-1</sup>

| Sample                                          | R <sub>ct</sub> (Ohm) | R <sub>s</sub> (Ohm) |
|-------------------------------------------------|-----------------------|----------------------|
| f-Ti <sub>3</sub> C <sub>2</sub> T <sub>x</sub> | 99.3                  | 1.16                 |
| Co <sub>3</sub> O <sub>4</sub>                  | 238.2                 | 1.60                 |
| H-4                                             | 130.0                 | 1.30                 |
| H-4 electrode after 700<br>cycles               | 175.4                 | 8.87                 |
